# Supplementary material for: Identification of multiple odorant receptors essential for pyrethrum repellency in Drosophila melanogaster
Source: PubMed Central journal article supplement (PMC8291717; doi:10.1371/journal.pgen.1009677), 2021-07-08
Supplement: pgen.1009677.s001.pdf [file pgen.1009677.s001.pdf]

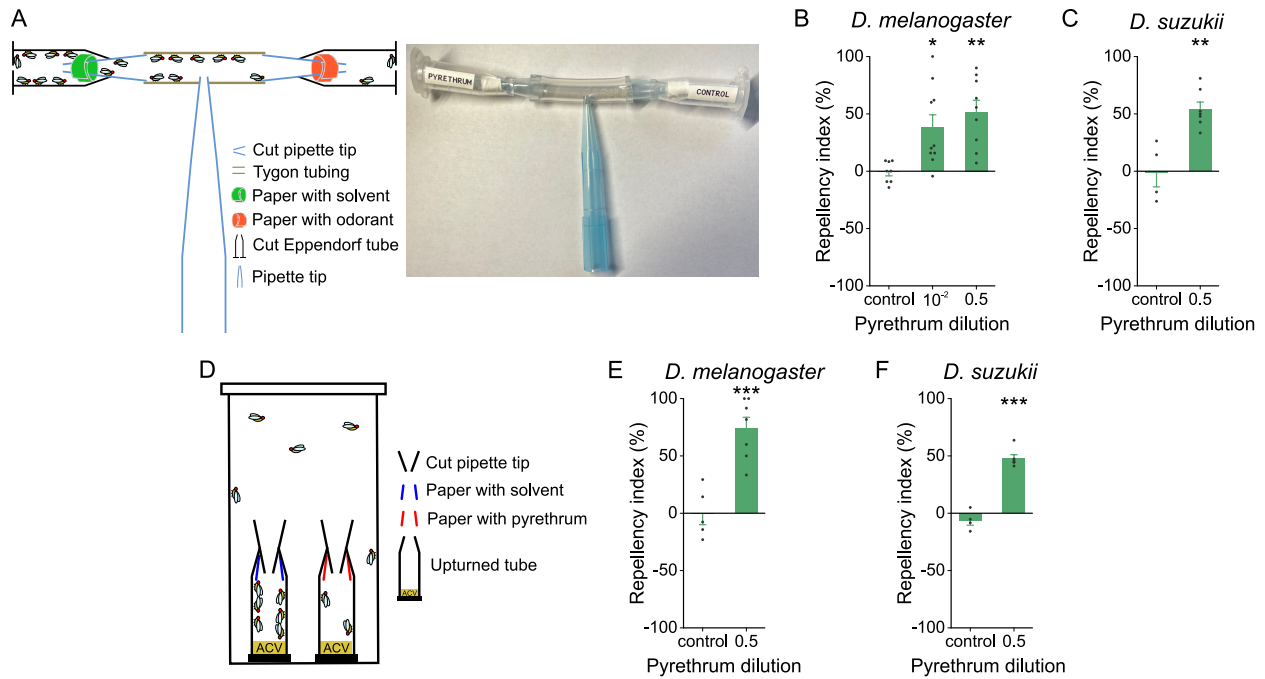

**S1 Fig. Pyrethrum repels *D. melanogaster* and *D. sukuzii*.**

(A) Schematic drawing of a T-maze assay. (B) T-maze assay measures of pyrethrum repellency in *D. melanogaster* [ $F_{(2,24)} = 7.96$ ,  $P = 0.002$ ;  $*P < 0.05$ ,  $**P < 0.01$  compared to control, One-Way ANOVA,  $n = 8$  for control,  $n = 10$  for 10<sup>-2</sup> dilution ( $v v^{-1}$ ), and  $n = 9$  for 0.5 dilution ( $v v^{-1}$ )]. (C) T-maze assay measures of pyrethrum repellency in *D. sukuzii* [ $t = 4.42$ ,  $d.f. = 9$ ,  $P = 0.002$ ;  $**P < 0.01$  compared to control,  $t$ -test,  $n = 4$  for control, and  $n = 7$  for 0.5 dilution ( $v v^{-1}$ )]. (D) Schematic drawing of a two-choice attraction assay. (E) Two-choice attraction assay measures of pyrethrum repellency in *D. melanogaster* [ $t = 5.16$ ,  $d.f. = 10$ ,  $P < 0.001$ ;  $***P < 0.001$  compared to control,  $t$ -test,  $n = 5$  for control, and  $n = 7$  for 0.5 dilution ( $v v^{-1}$ )]. (F) Two-choice attraction assay measures of pyrethrum repellency in *D. sukuzii* [ $t = 10.10$ ,  $d.f. = 8$ ,  $P < 0.001$ ;  $***P < 0.001$  compared to control,  $t$ -test,  $n = 4$  for control, and  $n = 6$  for 0.5 dilution ( $v v^{-1}$ )].
