# Supplementary material for: Identification of multiple odorant receptors essential for pyrethrum repellency in Drosophila melanogaster
Source: PubMed Central journal article supplement (PMC8291717; doi:10.1371/journal.pgen.1009677), 2021-07-08
Supplement: pgen.1009677.s003.pdf [file pgen.1009677.s003.pdf]

*D. suzukii*

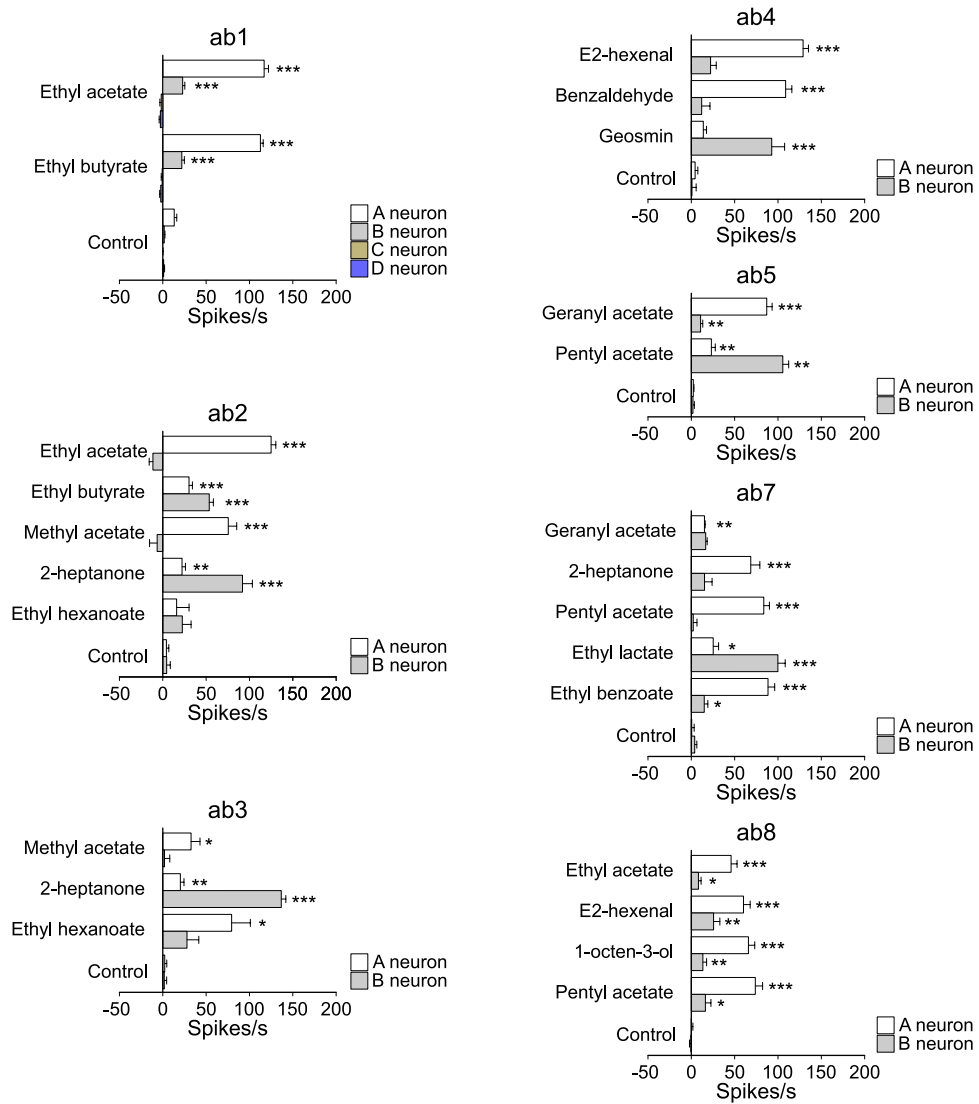

**S3 Fig. Response profiles of seven types of ab sensilla in *D. suzukii*.**

Response profiles to a panel of discriminating odorants at 30  $\mu$ L of the  $10^{-2}$  dilution (v v<sup>-1</sup>) of ab1-5 and ab7-8 in *D. suzukii* (\* $P < 0.05$ , \*\* $P < 0.01$ , \*\*\* $P < 0.001$ , test compound versus control,  $n = 6-10$  flies/sensilla).
