# Supplementary material for: Identification of multiple odorant receptors essential for pyrethrum repellency in Drosophila melanogaster
Source: PubMed Central journal article supplement (PMC8291717; doi:10.1371/journal.pgen.1009677), 2021-07-08
Supplement: pgen.1009677.s004.pdf [file pgen.1009677.s004.pdf]

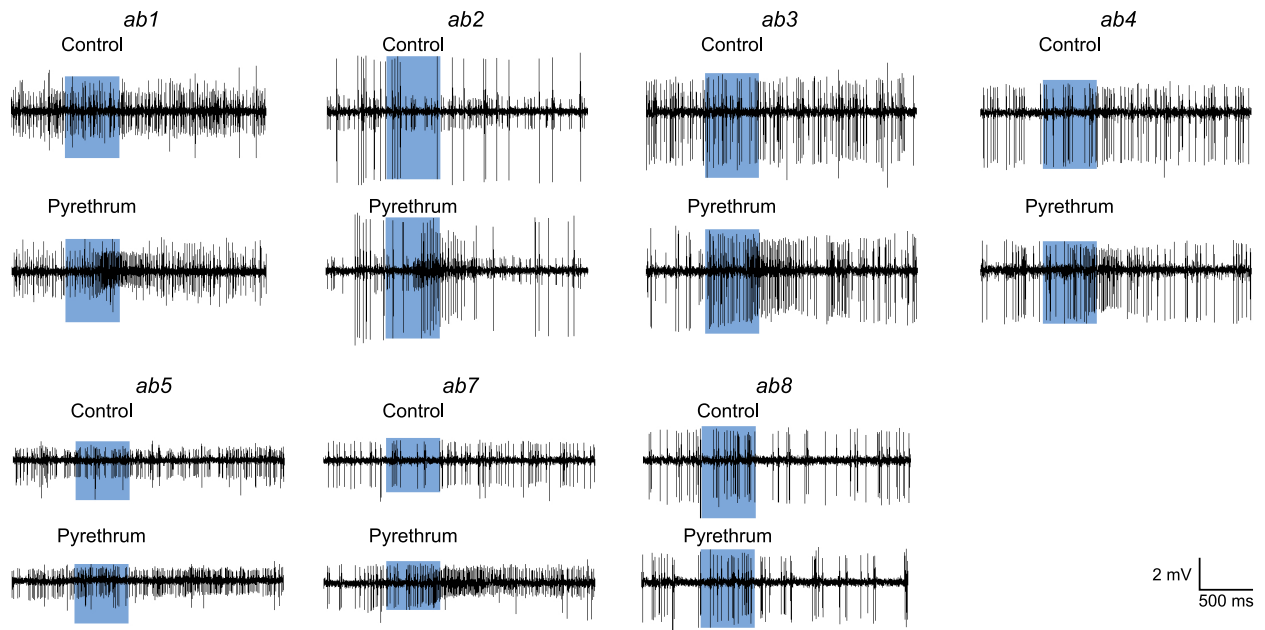

**S4 Fig. Representative single sensillum recording traces from *ab1-5* and *ab7-8* sensilla in response to pyrethrum at 30  $\mu\text{L}$  of the  $10^{-2}$  dilution ( $\text{v v}^{-1}$ ) in *D. sukuzii*.**
