# Supplementary material for: Identification of multiple odorant receptors essential for pyrethrum repellency in Drosophila melanogaster
Source: PubMed Central journal article supplement (PMC8291717; doi:10.1371/journal.pgen.1009677), 2021-07-08
Supplement: pgen.1009677.s005.pdf [file pgen.1009677.s005.pdf]

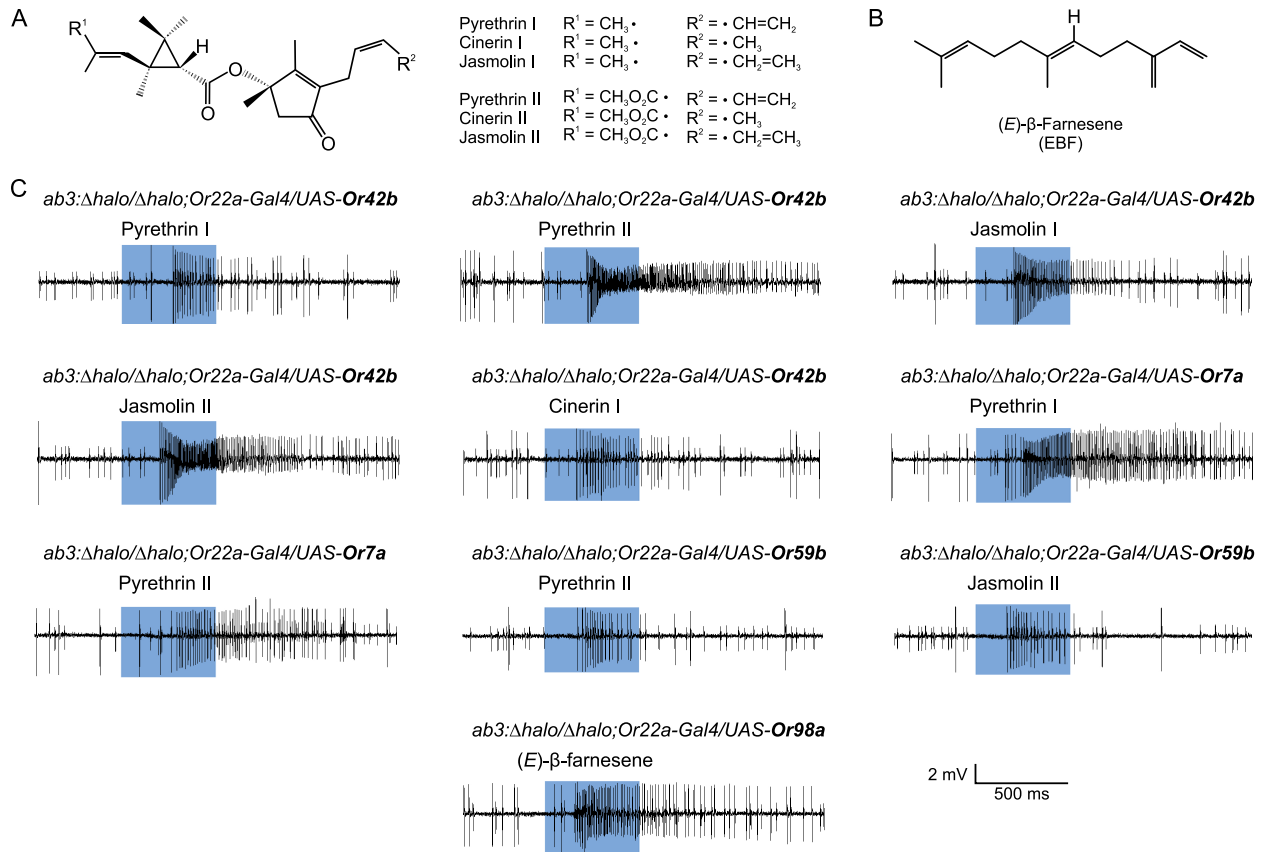

**S5 Fig. Activation of pyrethrum-responsive Ors by components of pyrethrum in the *ab3A* empty neuron system.**

(A) Chemical structures of pyrethrins. (B) Chemical structure of (*E*)-β-farnesene. (C) Representative single sensillum recording (SSR) traces from Or42b, Or59b, Or7a, and Or98a heterologously expressed in the *ab3A* empty neuron (*ab3: Δhalo/Δhalo; Or22a-Gal4/UAS-Orx*) to pyrethrum components (Table 3).
