# Supplementary material for: Identification of multiple odorant receptors essential for pyrethrum repellency in Drosophila melanogaster
Source: PubMed Central journal article supplement (PMC8291717; doi:10.1371/journal.pgen.1009677), 2021-07-08
Supplement: pgen.1009677.s007.pdf [file pgen.1009677.s007.pdf]

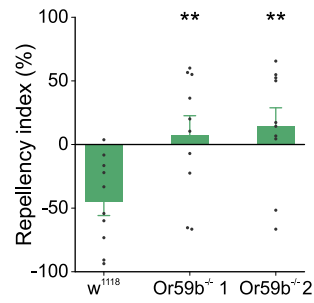

**S7 Fig. Or59b-mediated acetone attraction in *D. melanogaster*.**

Two-choice assay showing that acetone at 50  $\mu$ L of the  $10^{-4}$  dilution ( $v v^{-1}$ ) elicits attraction in  $w^{1118}$  *D. melanogaster* flies. This attraction was abolished in both *Or59b<sup>-1</sup>* lines ( $H = 9.28$ ,  $d.f. = 2$ ,  $P = 0.01$ ;  $**P < 0.01$  compared to the  $w^{1118}$ , One-Way ANOVA on Ranks,  $n = 10$  for each line).
