# Supplementary material for: Identification of multiple odorant receptors essential for pyrethrum repellency in Drosophila melanogaster
Source: PubMed Central journal article supplement (PMC8291717; doi:10.1371/journal.pgen.1009677), 2021-07-08
Supplement: pgen.1009677.s008.pdf [file pgen.1009677.s008.pdf]

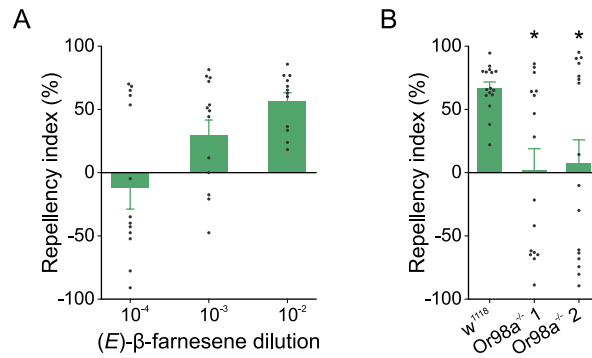

**S8 Fig. Behavioral responses of *W<sup>1118</sup>* and *Or98a<sup>-/-</sup>* flies to (*E*)-β-farnesene.**

(A) Two-choice assay to measure fly response to increasing concentrations of (*E*)-β-farnesene [ $n = 13$  for 50  $\mu$ L of the  $10^{-4}$  and  $10^{-3}$  dilutions ( $v v^{-1}$ ), and  $n = 12$  for 50  $\mu$ L of the  $10^{-2}$  dilution ( $v v^{-1}$ )]. (B) Repellency by (*E*)-β-farnesene was abolished in both *Or98a<sup>-/-</sup>* flies. Behavioral responses of *w<sup>1118</sup>* and two *Or98a<sup>-/-</sup>* lines to (*E*)-β-farnesene at  $10^{-2}$  dilution ( $v v^{-1}$ ) ( $H = 6.36$ ,  $d.f. = 2$ ,  $P < 0.042$ ;  $*P < 0.05$  compared to *w<sup>1118</sup>*, One-Way ANOVA on Ranks with Dunnett's test against control,  $n = 16$  for each fly line.
