# Supplementary material for: Identification of multiple odorant receptors essential for pyrethrum repellency in Drosophila melanogaster
Source: PubMed Central journal article supplement (PMC8291717; doi:10.1371/journal.pgen.1009677), 2021-07-08
Supplement: pgen.1009677.s009.pdf [file pgen.1009677.s009.pdf]

**S1 Table. List of primers used in this study.**

| Primer name           | Sequence                                      | Used for                 |
|-----------------------|-----------------------------------------------|--------------------------|
| Or7a ge F2            | GATGGGGTTCTTCGGGTTCTTAAG                      | genomic PCR & sequencing |
| Or7a ge R2            | ACCACCGAGAAGCAGGCGTAGATG                      | genomic PCR & sequencing |
| Or7a ge F3            | GAGTTAGAGGATTACCAACTGAGG                      | genomic PCR & sequencing |
| Or7a ge R3            | GGTTAGCAGGCTTCTGTCTTGCC                       | genomic PCR & sequencing |
| Or7a CRISPR5' chi FW  | <u>CTTCGTGCTCACCGCCATGGCTGA</u>               | sgRNA                    |
| Or7a CRISPR5' chi RV  | <u>AAACTCAGCCATGGCGGTGAGCAC</u>               | sgRNA                    |
| Or7a CRISPR3' chi FW  | <u>CTTCGCGCTCTACACGCTCATCAAG</u>              | sgRNA                    |
| Or7a CRISPR3' chi RV  | <u>AAACCTTGATGAGCGTGTAGAGCGC</u>              | sgRNA                    |
| Or7a 5' arm AarI FW   | GGTACACCTGCGCAGTGCACATAAAGAAGCATATTGCTGCTG    | donor                    |
| Or7a 5' arm AarI RV   | GGACCACCTGCCCTCCTACTGATGGACTTTTGACGCCTGGGAA   | donor                    |
| Or7a 3' arm SapI FW   | GAGTGCTCTTCTTATAAGGGGATGAATCTCGGCGAGCG        | donor                    |
| Or7a 3' arm SapI RV   | GGCTGCTCTTCGGACACAACTGGATCTGCTGGATGTGG        | donor                    |
| Or7a ge F4            | TAACGAATCGAATCGAAATGAGGG                      | sequencing               |
| Or7a ge R4            | AAAAGTAGCGCATCCTATAGATAC                      | sequencing               |
| Or59b ge 5' F1        | AGTTGACAGGGCTGCTTGACCTC                       | genomic PCR & sequencing |
| Or59b ge 5' R1        | ACGCAGGTCCAGAAGAGATACACG                      | genomic PCR & sequencing |
| Or59b ge 3' F2        | CCATTTTAGGTGGCCAAGTTCGCC                      | genomic PCR & sequencing |
| Or59b ge 3' R2        | GTTGTTACAATCGTCGTCGACTCG                      | genomic PCR & sequencing |
| Or59b CRISPR5' chi FW | <u>CTTCGATGCCACTGACCGGTGGT</u>                | sgRNA                    |
| Or59b CRISPR5' chi RV | <u>AAACACCACCGGTGCTGGGCATC</u>                | sgRNA                    |
| Or59b CRISPR3' chi FW | <u>CTTCGCTCATAAAGAATTGCTGGG</u>               | sgRNA                    |
| Or59b CRISPR3' chi RV | <u>AAACCCAGCAATTCTTTATGAGC</u>                | sgRNA                    |
| Or59b 5' arm AarI FW  | GGTACACCTGCGCAGTGCCTCAAGGACGAACCGTTTCAGGTGC   | donor                    |
| Or59b 5' arm AarI RV  | GGACCACCTGCCCTCCTACGGTCCGTGCCAGCAACTGCACCTT   | donor                    |
| Or59b 3' arm SapI FW  | GAGTGCTCTTCTTATAGCAATCTTTATGAGCGTGTTTTGC      | donor                    |
| Or59b 3' arm SapI RV  | GGCTGCTCTTCGGACCCTTCCAGCTGCAGCGAAATCAC        | donor                    |
| Or42b ge 5' F1        | TAAACATAACATAGCGCAGCAGAG                      | genomic PCR & sequencing |
| Or42b ge 5' R1        | ACCACACGAACGTCATTAGCGTCC                      | genomic PCR & sequencing |
| Or42b ge 3' F1        | CTACCCCATCACTAGGTGGCAAAG                      | genomic PCR & sequencing |
| Or42b ge 3' R1        | CTAGTATACCCTTTATCTCTACGAG                     | genomic PCR & sequencing |
| Or42b CRISPR5' chi FW | <u>CTTCGAGCAGAAGCGGTCCCGAGA</u>               | sgRNA                    |
| Or42b CRISPR5' chi RV | <u>AAACTCTCGGGACCGCTTCTGCTC</u>               | sgRNA                    |
| Or42b CRISPR3' chi FW | <u>CTTCGGTCTCGTTTTAGGGAAGAA</u>               | sgRNA                    |
| Or42b CRISPR3' chi RV | <u>AAACTTCTTCCCTAAAACGAGACC</u>               | sgRNA                    |
| Or42b 5' arm AarI FW  | GGTACACCTGCGCAGTGCCTCGGCAGAGTTCTTCGTAGCCG     | donor                    |
| Or42b 5' arm AarI RV  | GGACCACCTGCCCTCCTACCGGGACCGCTTCTGCTCCGTGAGC   | donor                    |
| Or42b 3' arm SapI FW  | GAGTGCTCTTCTTATTTCCCTAAAACGAGACCCCCACAAAC     | donor                    |
| Or42b 3' arm SapI RV  | GGCTGCTCTTCGGACTGTTTGTGGCGATGATCGTCTATGG      | donor                    |
| Or98a 5' geF1         | GATGTGGTTAGCCTAGATTACAGG                      | genomic PCR & sequencing |
| Or98a 5' geRV         | TGGCAAGTATACGGCACACCAAGC                      | genomic PCR & sequencing |
| Or98a 3' geF1         | TGTTTTTCAGGTGGCTAAGCTGGC                      | genomic PCR & sequencing |
| Or98a 3' geR1         | AACTTCCCTTCCAGCAGACAGCCC                      | genomic PCR & sequencing |
| Or98a CRISPR5' chi FW | <u>CTTCGTCAAAGGTTTTGTCGGATT</u>               | sgRNA                    |
| Or98a CRISPR5' chi RV | <u>AAACAATCCGACAAACCTTTTGAC</u>               | sgRNA                    |
| Or98a CRISPR3' chi FW | <u>CTTCGGAAGCTGACAAGTTAAAGG</u>               | sgRNA                    |
| Or98a CRISPR3' chi RV | <u>AAACCCTTAACTTGTCTCAGCTTCC</u>              | sgRNA                    |
| Or98a 5' arm AarI FW  | GGTACACCTGCGCAGTGCCTTGTGCGTTGCCAGCGTGGGAACG   | donor                    |
| Or98a 5' arm AarI RV  | GGACCACCTGCCCTCCTACATTCGGCTTTCGACAGATAGTTGAAC | donor                    |
| Or98a 3' arm SapI FW  | GAGTGCTCTTCTTATAGGGGATTAGAAGCAACTACCAAC       | donor                    |
| Or98a 3' arm SapI RV  | GGCTGCTCTTCGGACAGACAGACTCCTGCATTTCG           | donor                    |
